# Supplementary material
Source: Springer Nature journal article supplement (https://www.springermedizin.de/resource/supplementary/12887_2011_604_MOESM1_ESM.pdf/9475358)

## INTERVENTION GROUP

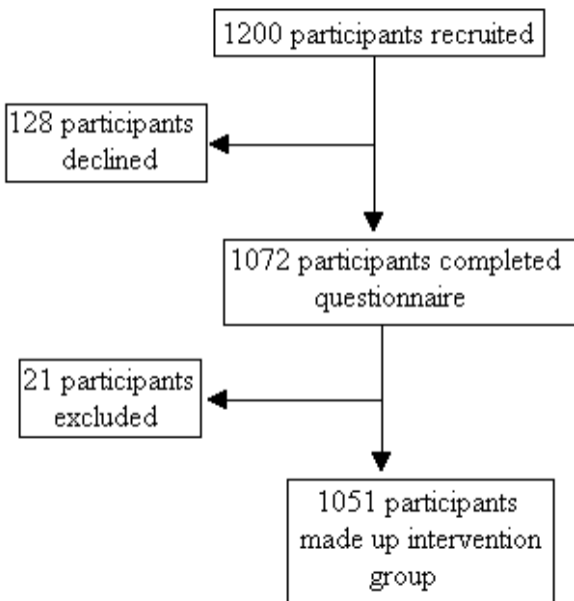

## CONTROL GROUP

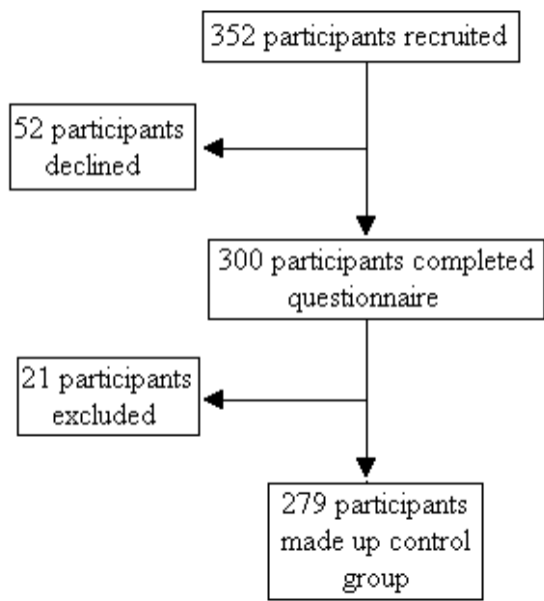

Supplement: MOESM1 [file 9475358]
